# Supplementary material for: Organocatalytic chiral polymeric nanoparticles for asymmetric aldol reaction
Source: Royal Society of Chemistry journal article supplement (doi:10.1039/d2ra07244k), 2023-01-01
Supplement: d2ra07244k1.pdf [file d2ra07244k1.pdf]

Supplementary Data

Organocatalytic Chiral Polymeric Nanoparticles for Asymmetric Aldol Reaction

Meir Abuaf, Subhomoy Das, Yitzhak Mastai \*

Bar-Ilan University Ramat-Gan 52900, Israel

Contents

|                                                 |    |
|-------------------------------------------------|----|
| 1. Structure of the monomers and polymers ..... | 2  |
| a. Scheme for the polymerization method .....   | 3  |
| 2. Characterization of the monomers .....       | 4  |
| 3. Characterization of the crosslinker .....    | 11 |
| 4. DLS results of nanoparticles .....           | 13 |
| 5. HPLC chromatograms of the catalysts .....    | 13 |
| 6. Reference.....                               | 15 |

1. Structure of the monomers and polymers

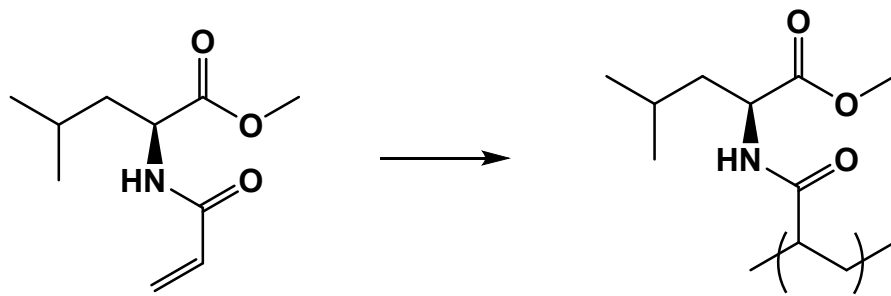

N-Acryloyl-L-Leucine Methyl Ester

Poly(L-Leu-OMe)

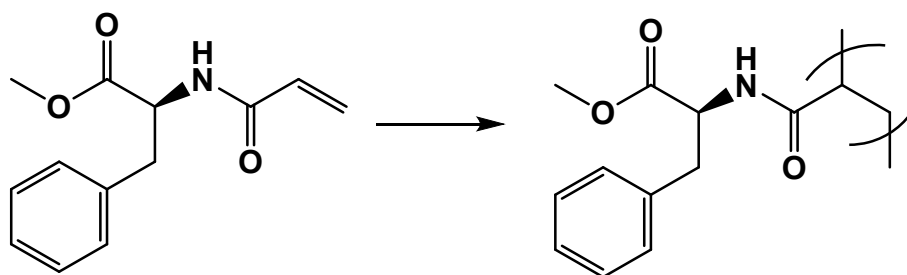

N-Acryloyl-L-Phenylalanine Methyl Ester

Poly(L-Phe-OMe)

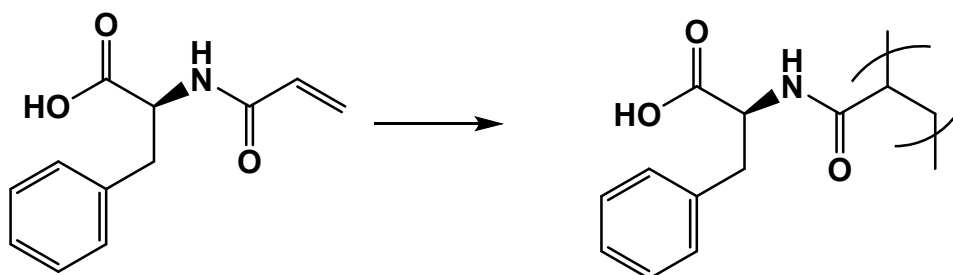

N-Acryloyl-L-Phenylalanine

Poly(L-Phe)

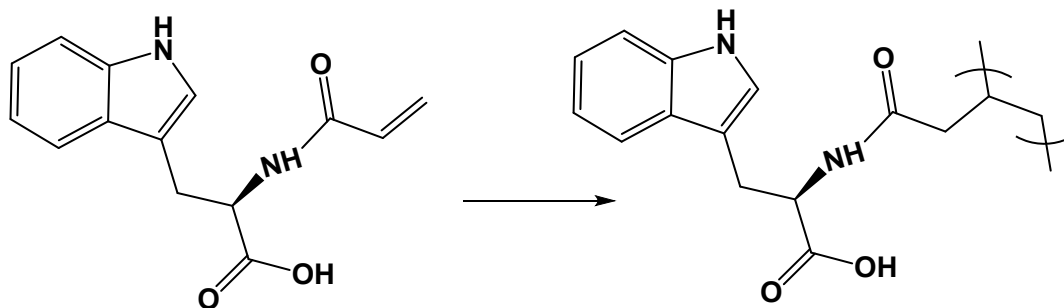

N-Acryloyl-L-Tryptophan

Poly(L-Trp)

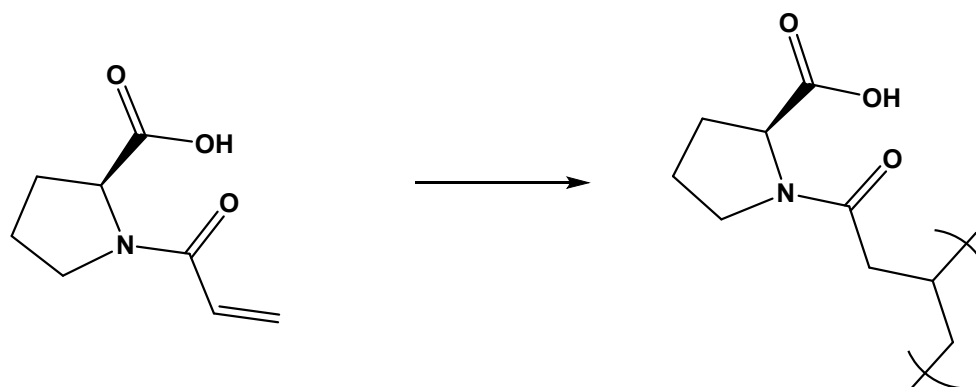

N-Acryloyl-L-Proline

Poly(L-Proline)

**Scheme S1.** Structure of the synthesized monomers and polymers.

a. Scheme for the polymerization method

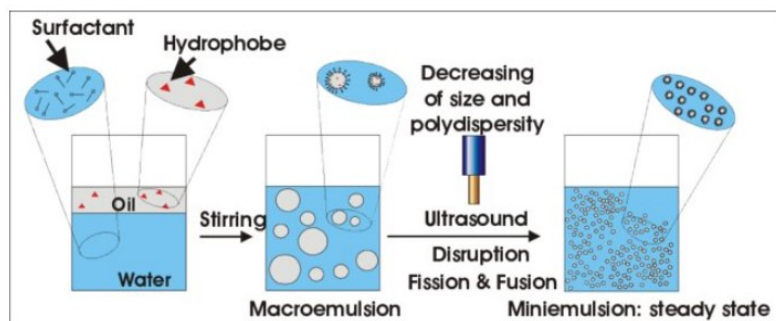

**Scheme S2.** Demonstration of miniemulsion polymerization<sup>1</sup>.

## 2. Characterization of the monomers

| Monomer                                 | <sup>1</sup> H NMR                                                                                                                                                                                                                                                                                                                                                                                                          | <sup>13</sup> C NMR                                                                                                                                                                                                    | Mass Spectroscopy                                                                                                                                                          |
|-----------------------------------------|-----------------------------------------------------------------------------------------------------------------------------------------------------------------------------------------------------------------------------------------------------------------------------------------------------------------------------------------------------------------------------------------------------------------------------|------------------------------------------------------------------------------------------------------------------------------------------------------------------------------------------------------------------------|----------------------------------------------------------------------------------------------------------------------------------------------------------------------------|
| N-Acryloyl-L-Leucine Methyl Ester       | (CDCl <sub>3</sub> , 400 MHz) δ: 6.30 (dd, <i>J</i> = 17, 2 Hz, 1H), 6.13 (dd, <i>J</i> = 17, 10 Hz, 1H), 6.08 (brd, 8 Hz, 1H), 5.67 (dd, <i>J</i> = 10, 2 Hz, 1H), 4.73 (dd, <i>J</i> = 8, 5 Hz, 1H), 1.72-1.52 (m, 3H), 0.94 (t, <i>J</i> = 6 Hz, 6H).                                                                                                                                                                    | (CDCl <sub>3</sub> , 100 MHz) δ: 173.59 (C), 165.12 (C), 130.31 (CH), 127.16 (CH <sub>2</sub> ), 52.32 (CH), 42.82 (CH <sub>2</sub> ), 24.86 (CH), 22.74 (CH <sub>3</sub> ), 21.97 (CH <sub>3</sub> ).                 | m/z (ES <sup>+</sup> ): 222 ([M+Na] <sup>+</sup> , 40), 200 (MH <sup>+</sup> , 40), 168 ([M-OMe] <sup>+</sup> , 40), 140 ([M-CO <sub>2</sub> Me] <sup>+</sup> , 100).      |
| N-Acryloyl-L-Phenylalanine Methyl Ester | (300 MHz, CDCl <sub>3</sub> ) δ: 7.33-7.19 (m, 3H), 7.14-7.03 (m, 2H), 6.29 (dd, <i>J</i> = 18, 2 Hz, 1H), 6.09 (dd, <i>J</i> = 18, 10 Hz, 1H), 6.02 (brd, <i>J</i> = 8 Hz, 1H), 5.71 (dd, <i>J</i> = 10, 2 Hz, 1H), 4.97 (dt, <i>J</i> = 8, 6 Hz, 1H), 3.74 (s, 3H), abx system δ <sub>A</sub> =3.20, δ <sub>B</sub> =3.16 (dd, <i>J</i> <sub>AB</sub> =13 Hz, <i>J</i> <sub>AX</sub> = <i>J</i> <sub>BX</sub> =6 Hz, 2H). | (100 MHz, CDCl <sub>3</sub> ) δ: 171.95 (C), 164.90 (C), 135.77 (C), 130.36 (CH), 129.32 (2xCH), 128.61 (2xCH), 127.20 (CH+CH <sub>2</sub> ), 53.18 (CH), 52.38 (CH <sub>3</sub> ), 37.88 (CH <sub>2</sub> ).          | m/z (ES <sup>+</sup> ): 256 234 ([M+Na] <sup>+</sup> , 100), 234 256 (MH <sup>+</sup> , 4), 202 ([M-OMe] <sup>+</sup> , 3), 174 ([M-CO <sub>2</sub> Me] <sup>+</sup> , 9). |
| N-Acryloyl-L-Phenylalanine              | (300 MHz, DMSO-d <sub>6</sub> ) δ: 8.43 (d, 8Hz, 1H), 7.24 (m, 5H), 6.27 (q, 17, 10 Hz, 1H), 6.07 (dd, 17, 2 Hz, 1H), 5.57 (dd, 10, 2 Hz, 1H), 4.51 (ddd, 10, 8, 5 Hz, 1H), 3.09 (dd, 14, 5 Hz, 1H), 2.89 (dd, 14, 10 Hz, 1H)                                                                                                                                                                                               | (100 MHz, DMSO-d <sub>6</sub> ) δ: 172.92 (C), 164.43 (C), 137.59 (C), 131.24 (CH), 129.01 (2xCH), 128.17 (2xCH), 126.40 (CH <sub>2</sub> ), 125.69 (CH), 53.52 (CH), 36.73 (CH <sub>2</sub> )                         | m/z (ES <sup>+</sup> ): 242 ([M+Na] <sup>+</sup> , 100), 220 (MH <sup>+</sup> , 15), 202 ([M-OH] <sup>+</sup> , 3), 174 ([M-CO <sub>2</sub> H] <sup>+</sup> , 19).         |
| N-Acryloyl-L-Tryptophan                 | (400 MHz, DMSO-d <sub>6</sub> ) δ: 10.8 (s, 1H), 8.4 (d, <i>J</i> = 8 Hz, 1H), 7.5 (d, <i>J</i> = 0.8 Hz, 1H) 7.3 (d, <i>J</i> = 0.8 Hz, 1H) 7.1 (d, <i>J</i> = 2.4 Hz, 1H) 6.9-7.0 (dt, 1 Hz, 2H), 6.3 (dd, <i>J</i> = 6.8 Hz, 1H), 6.0 (dd, <i>J</i> = 2 Hz, 1H) 5.5- (dd, <i>J</i> = 10.4 Hz, 1H), 4.5 (m, <i>J</i> = 4.8 Hz 1H), 3.1 (dd, <i>J</i> = 5.8 Hz, 1H), 3.0 (dd, <i>J</i> = 8.5 Hz, 1H).                      | (100 MHz, DMSO-d <sub>6</sub> ) δ: 173.59 (C), 165.12 (C), 174 136 (CH), 165.0 131 (CH <sub>2</sub> ), 118.0-127.0 (CH), 110.0-112.0 (CH <sub>2</sub> ), 24.86 (CH), 54.0 (CH <sub>3</sub> ), 28.0 (CH <sub>3</sub> ). | m/z (ES <sup>+</sup> ): 259 (MH <sup>+</sup> , 100), 281 ([M+Na] <sup>+</sup> , 60),                                                                                       |

|                             |                                                                                                                                                                                     |                                                                                                                                                                                                                                                                            |                                                               |
|-----------------------------|-------------------------------------------------------------------------------------------------------------------------------------------------------------------------------------|----------------------------------------------------------------------------------------------------------------------------------------------------------------------------------------------------------------------------------------------------------------------------|---------------------------------------------------------------|
| <p>N-Acryloyl-L-Proline</p> | <p>(400 MHz, CD<sub>3</sub>OD) δ: 6.7 (dd, <i>J</i> = 10 Hz, 1H), 6.3 (dd, <i>J</i> = 2 Hz, 1H), 5.78 (dd, <i>J</i> = 2 Hz, 1H), 4.5 (dd, 1H), 3.6-3.8 (m, 2H), 1.9-2.4 (m, 4H)</p> | <p>(100 MHz, CD<sub>3</sub>OD)<br/> δ: 175.0-175.4 (–COOH), 167.1-167.4 (–CONH–), 129.9 (–CH=CH<sub>2</sub>), 128.9 (–CH=CH<sub>2</sub>), 60.2 (&gt;CHCOOH), 30.2-32.2 (&gt;NCH<sub>2</sub>), 25.6 (–CH<sub>2</sub>–CHCOOH), 23.8 (&gt;NCH<sub>2</sub>–CH<sub>2</sub>)</p> | <p><i>m/z</i> (ES<sup>+</sup>): 170 (MH<sup>+</sup>, 100)</p> |
|-----------------------------|-------------------------------------------------------------------------------------------------------------------------------------------------------------------------------------|----------------------------------------------------------------------------------------------------------------------------------------------------------------------------------------------------------------------------------------------------------------------------|---------------------------------------------------------------|

**Table S1.** Characterization of the monomers by <sup>1</sup>H and <sup>13</sup>C NMR and MS instruments.

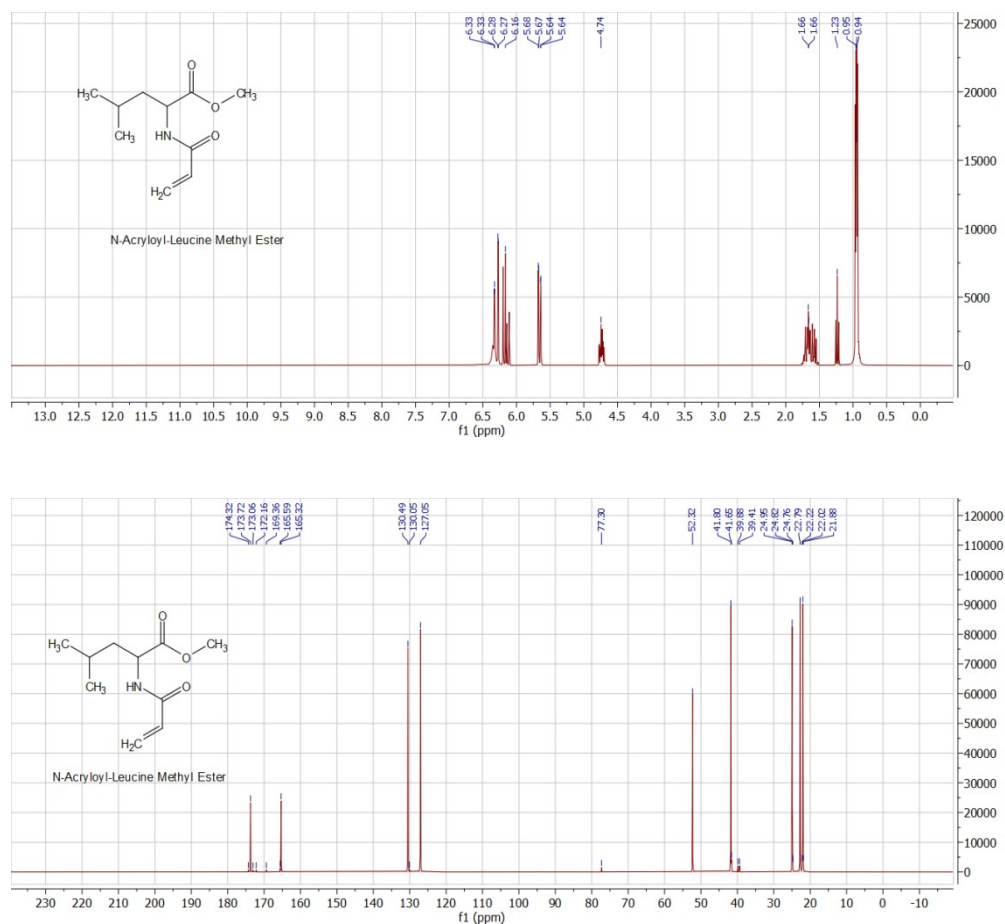

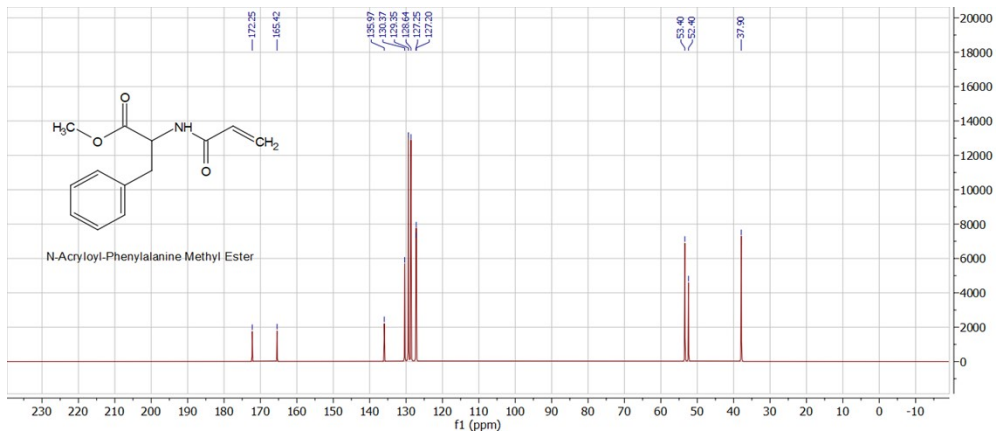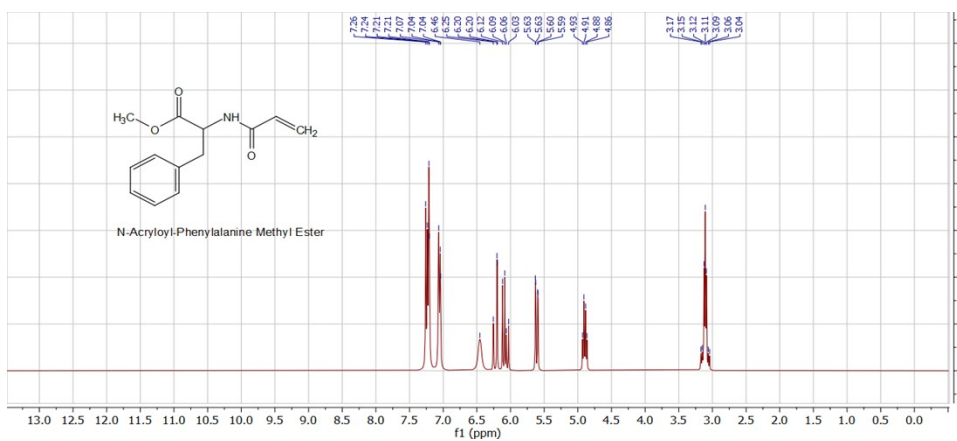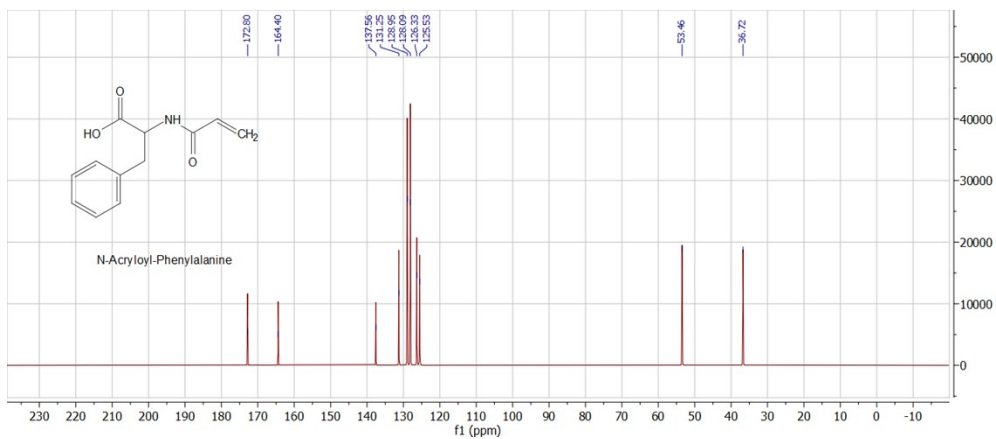

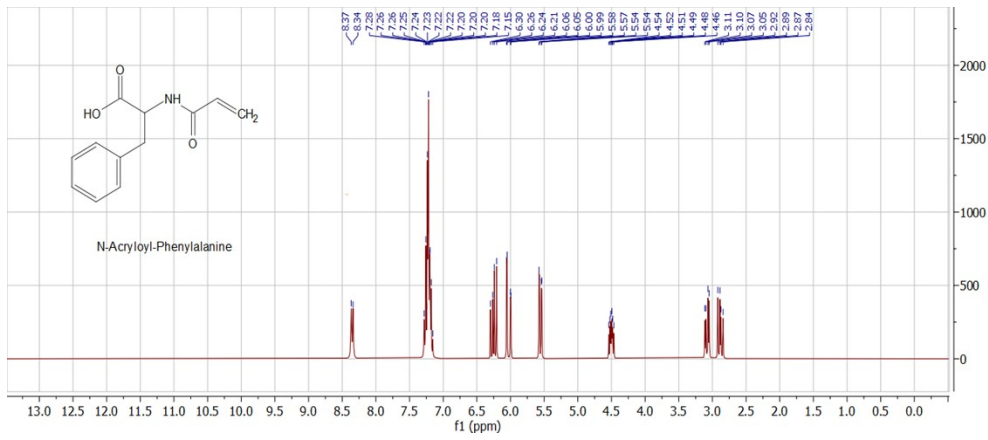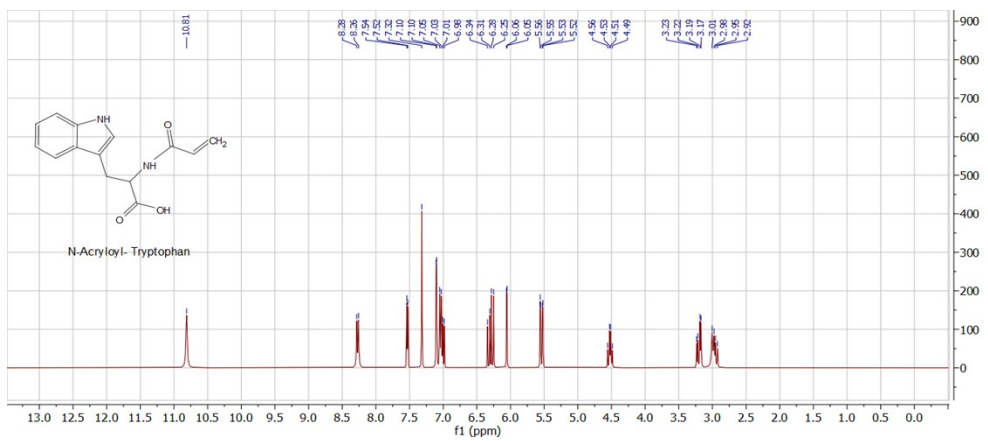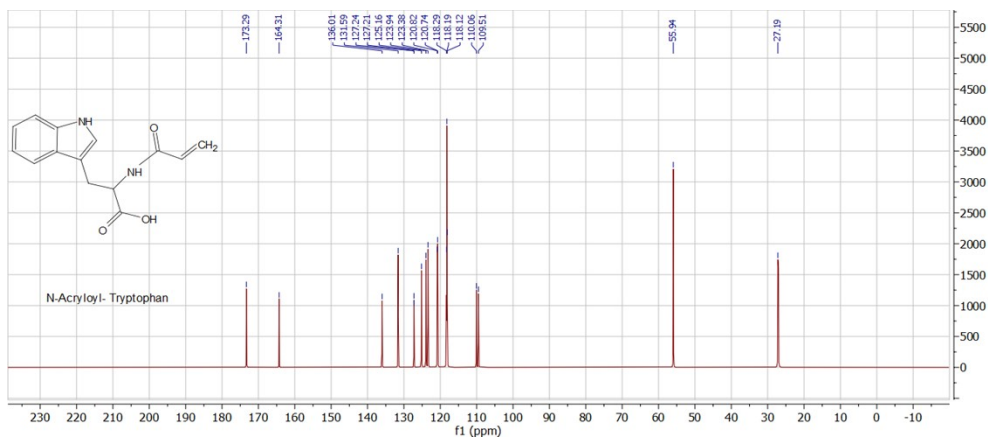

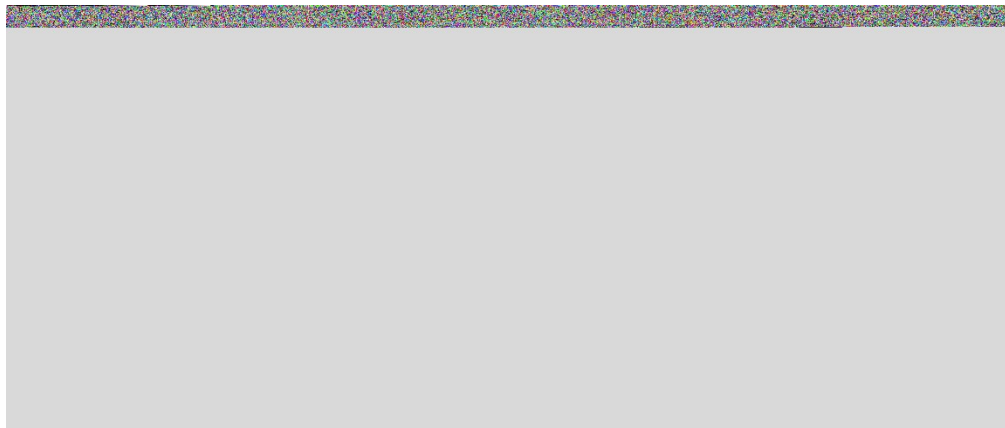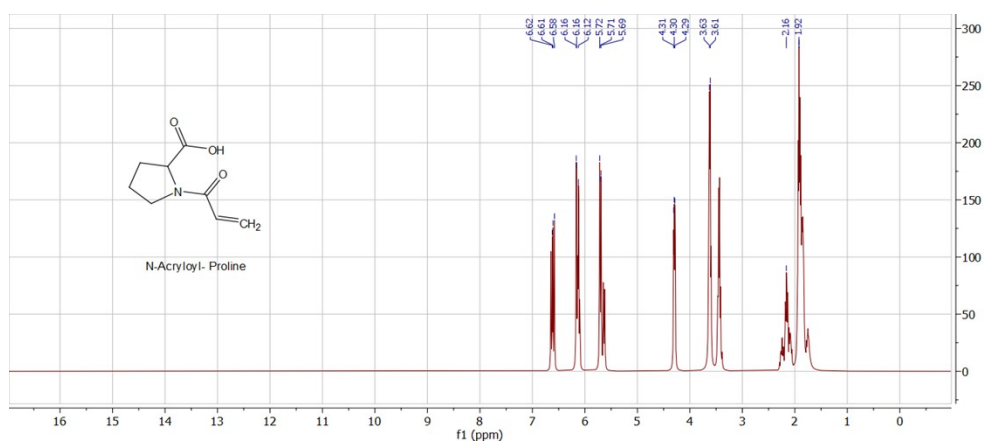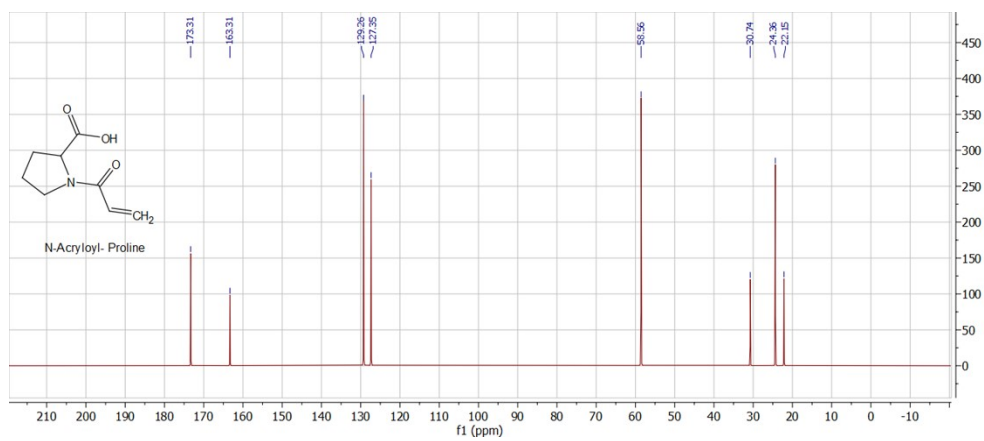



Figure S1. <sup>13</sup>C and <sup>1</sup>H NMR diagram of the monomers.

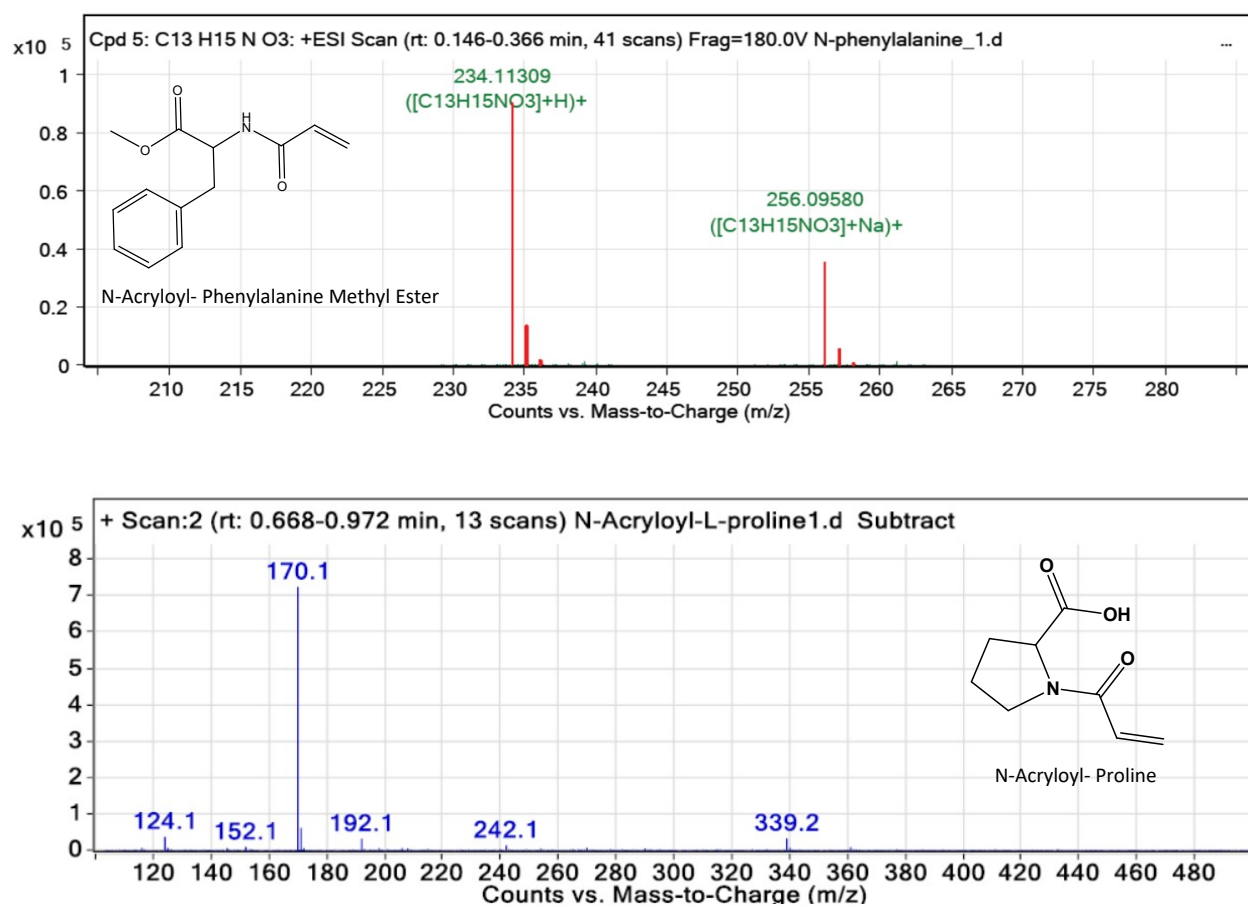

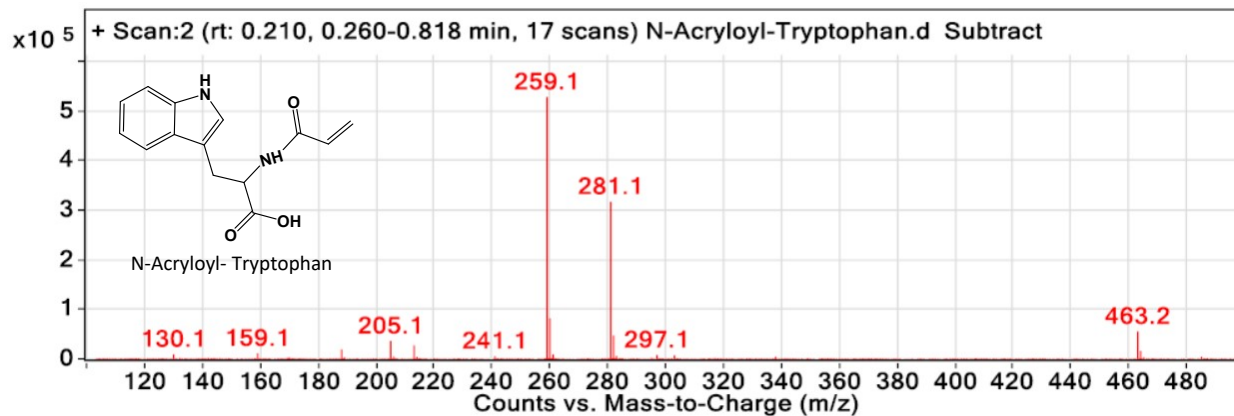

Figure S2. Mass diagram of the monomers.

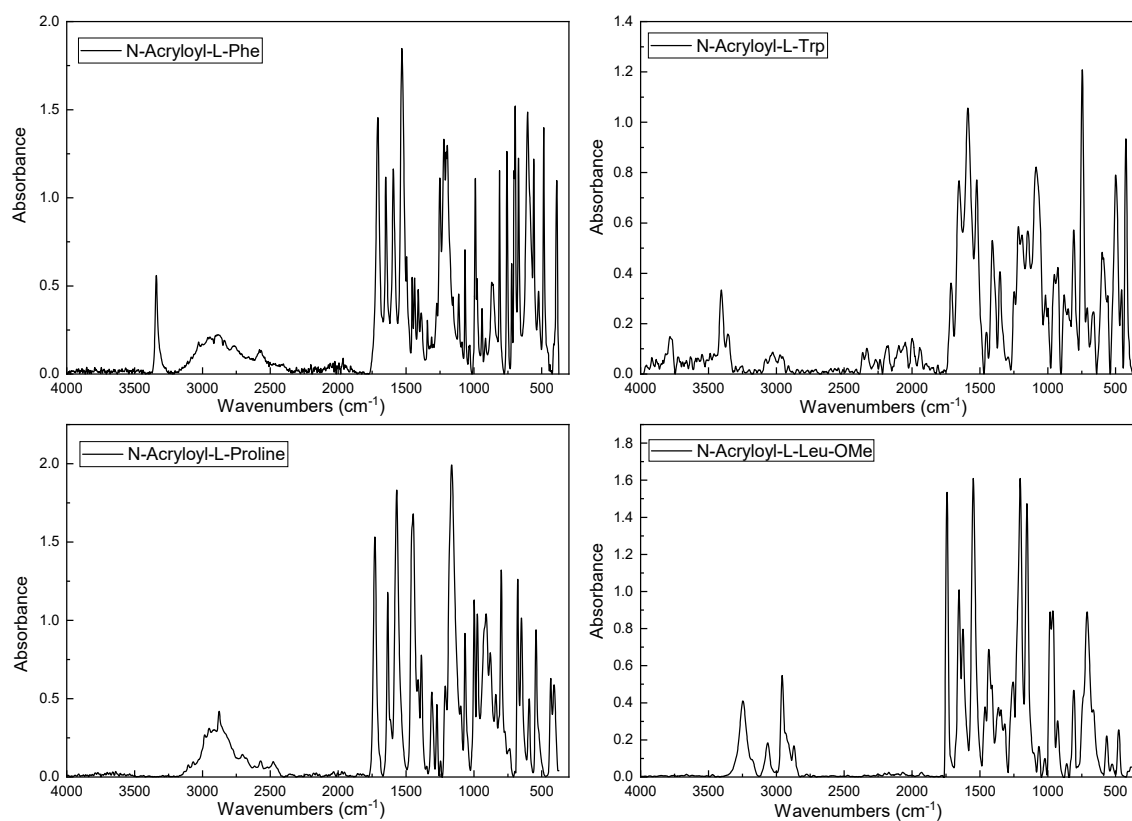

Figure S3. FTIR results of the monomers.

### 3. Characterization of the crosslinker

|                                               | $^1\text{H}$ NMR                                                                                                     | $^{13}\text{C}$ NMR                                                                                                                                                                                       | Mass                                                         |
|-----------------------------------------------|----------------------------------------------------------------------------------------------------------------------|-----------------------------------------------------------------------------------------------------------------------------------------------------------------------------------------------------------|--------------------------------------------------------------|
| Glutaric acid bis(N-hydroxysuccinimide ester) | (400 MHz, DMSO- $d_6$ ) $\delta$ : 10.8 (s, 1H), 8.4 (d, $J$ = 8 Hz, 1H), 7.5 (d, $J$ = 0.8 Hz, 1H) 7.3 (d, $J$ = 0. | (100 MHz, DMSO- $d_6$ ) $\delta$ : 170.08 (N-C=O), 168.27 (C-C=O), 39.65 ( $\text{CH}_2$ - $\text{CH}_2$ aliphatic), 25.35 ( $\text{CH}_2$ - $\text{CH}_2$ aromatic), 19.59 (- $\text{CH}_2$ - aliphatic) | m/z ( $\text{ES}^+$ ): 259 ( $[\text{M}+\text{Na}]^+$ , 100) |

**Table S2.** Characterization of the crosslinker by  $^1\text{H}$  NMR and  $^{13}\text{C}$  NMR instruments.

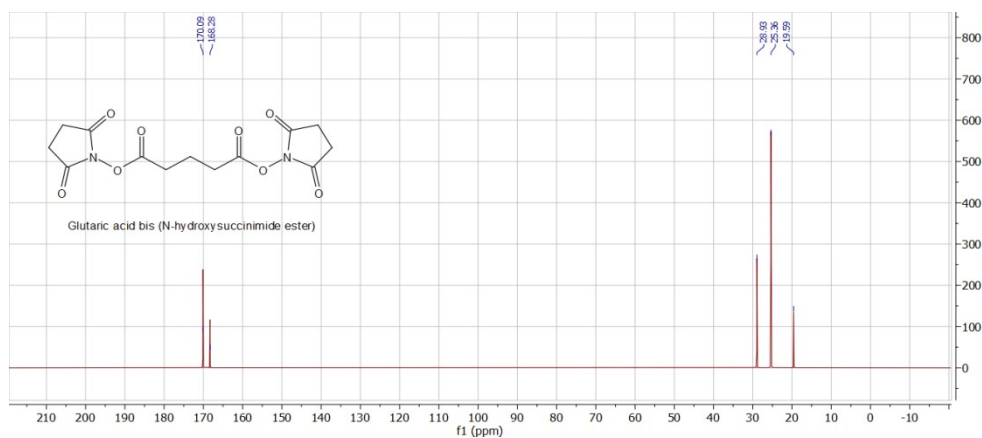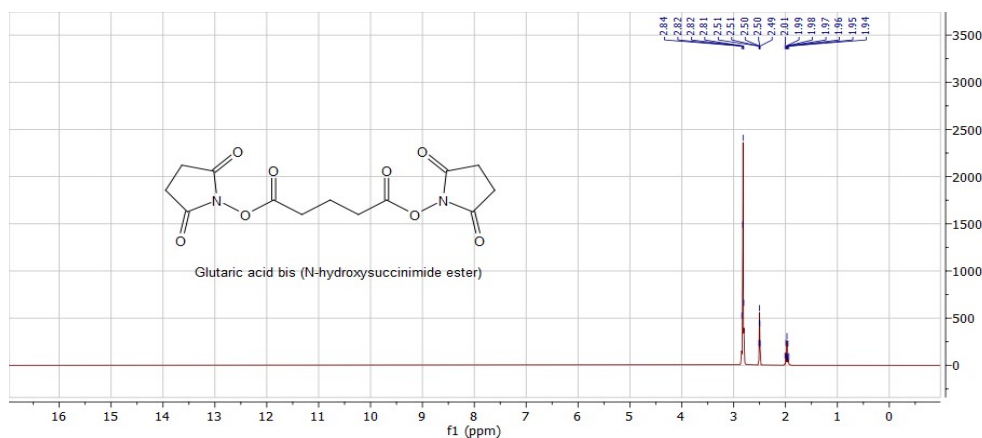

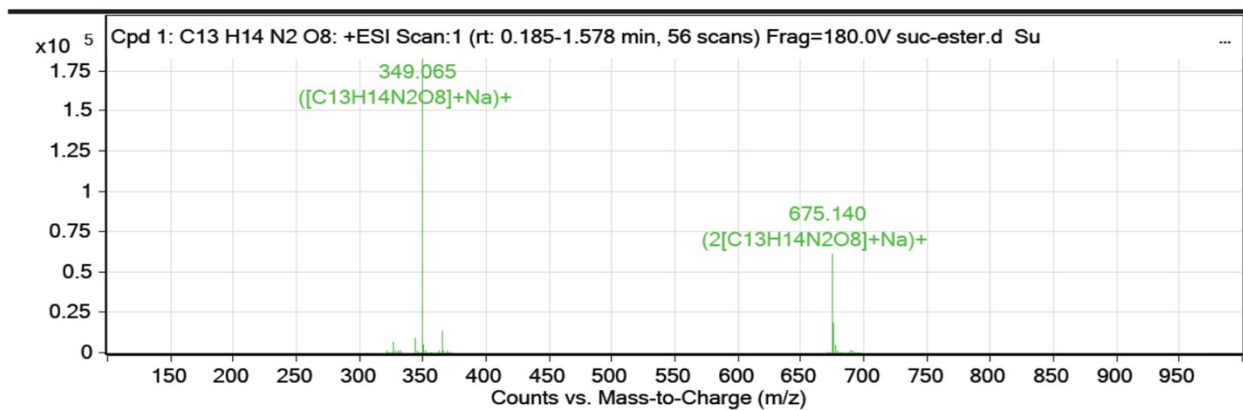

**Figure S4.** <sup>13</sup>C and <sup>1</sup>H NMR and Mass diagram of the crosslinker.

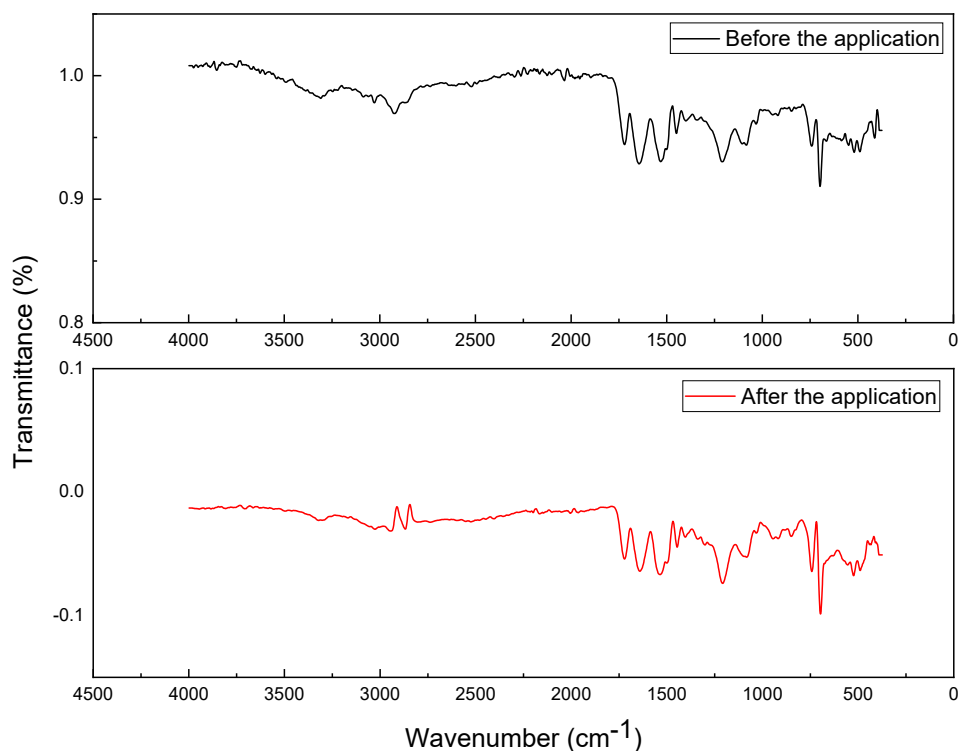

**Figure S5.** FTIR results of the crosslinker.

#### 4. DLS results of nanoparticles

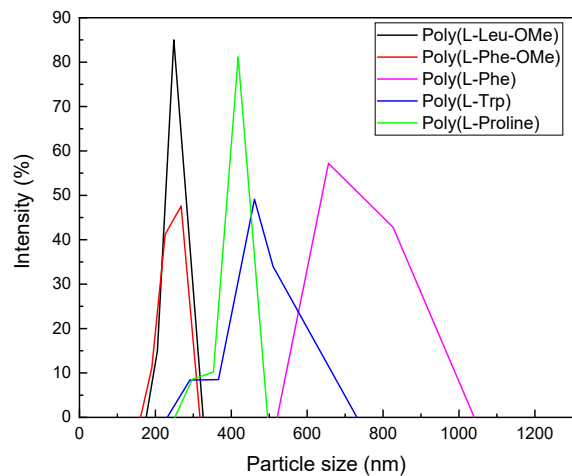

Figure S6. DLS results of nanoparticles; L- Leu-OMe, L- Phe-OMe, L- Phe, L-Trp and L-Proline

#### 5. HPLC chromatograms of the catalysts

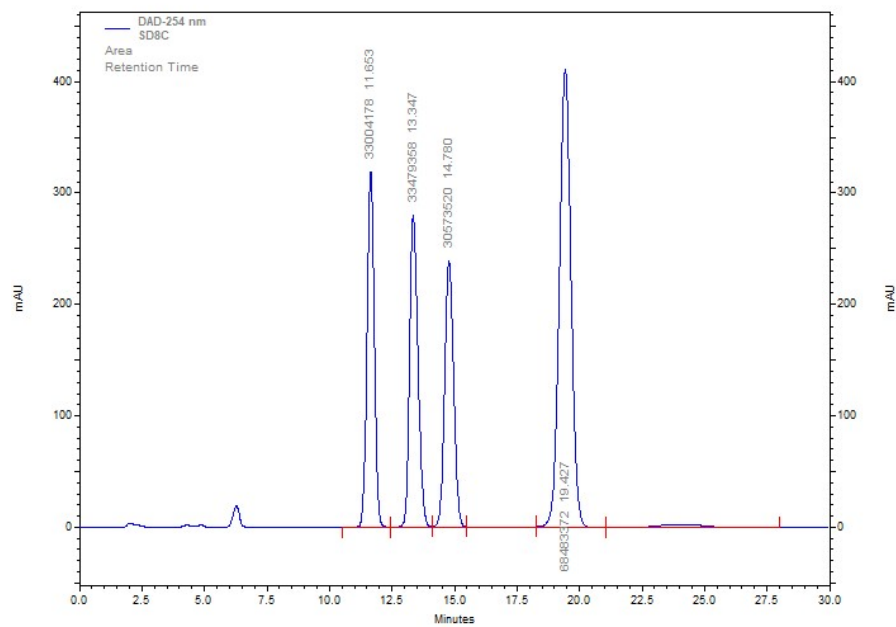

Figure S7. Non-crosslinked protected (L)-phenylalanine polymer, ee 39%.

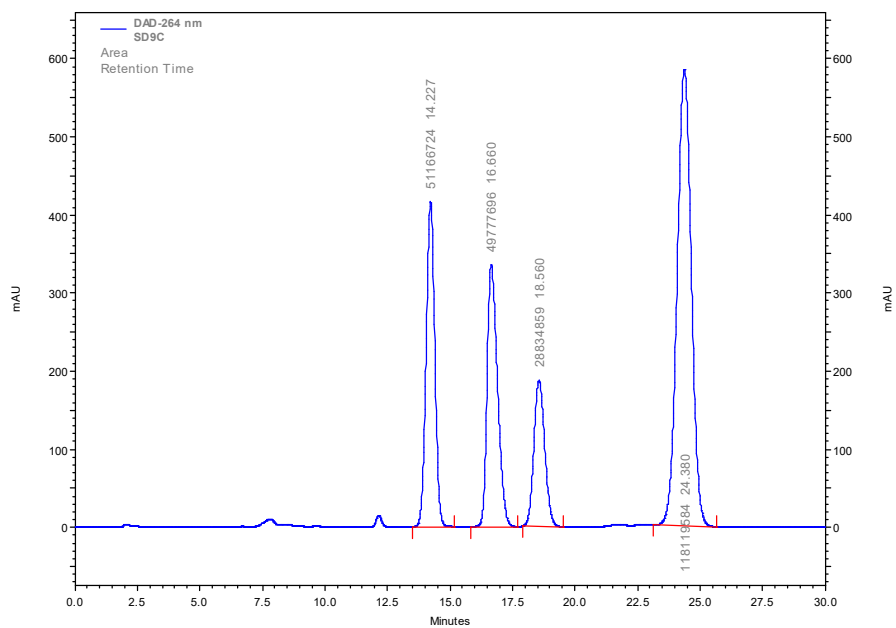

Figure S8. Non-crosslinked unprotected (L)-phenylalanine polymer, ee 61%

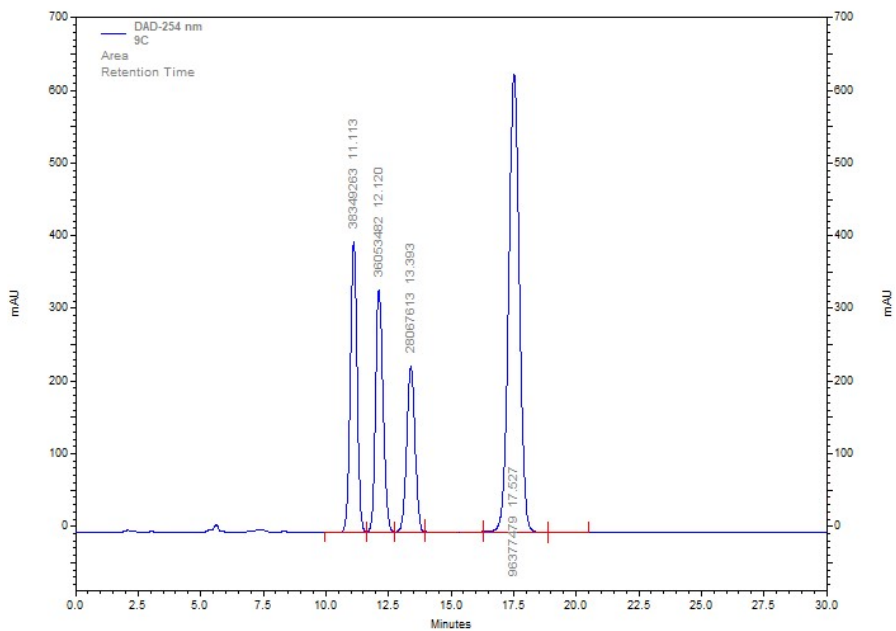

Figure S9. Non-crosslinked unprotected (L)-tyrosine polymer, ee 57%.

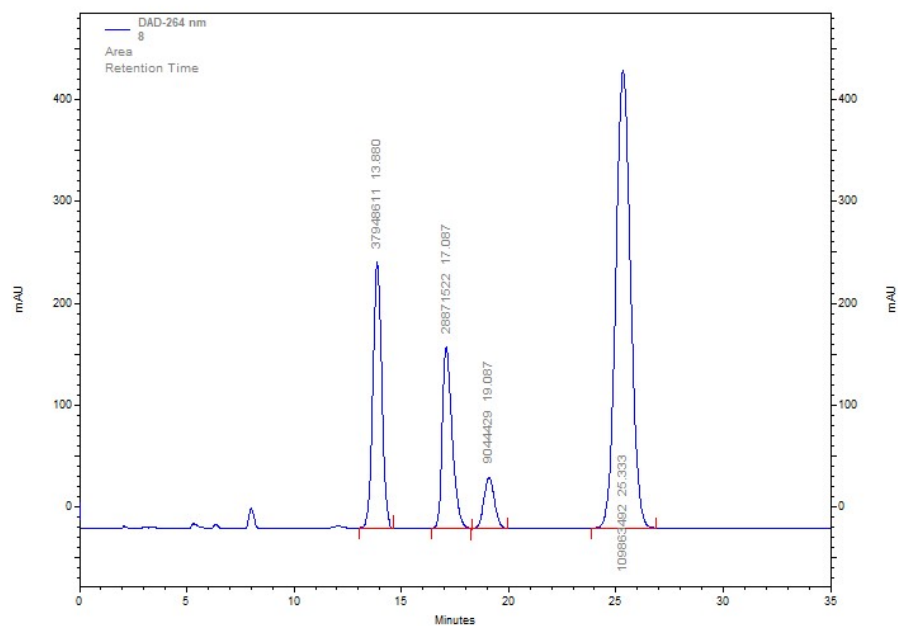

**Figure S10.** Non-crosslinked unprotected (L)-tryptophan polymer, ee 86%.

## 6. Reference

1. Montenegro RV. Crystallization, biomimetics and semiconducting polymers in confined systems.

Universität Potsdam; 2003.
